# Supplementary material for: Assessing functional impulsivity using functional near-infrared spectroscopy
Source: PubMed Central journal article supplement (PMC10790886; doi:10.3389/fnrgo.2023.1207484), 2023-12-01
Supplement: Data_Sheet_1.pdf [file Data_Sheet_1.pdf]

## Supplementary Materials

# Assessing Functional Impulsivity Using Functional Near-Infrared Spectroscopy

Kenta Nakazawa<sup>1</sup>, Kazue Hirabayashi<sup>2</sup>, Wakana Kawai<sup>1</sup>, Yasushi Kyutoku<sup>1</sup>, Keith Kawabata Duncan<sup>2</sup>, Ippeita Dan<sup>1\*</sup>

\* **Correspondence:** Corresponding Author: dan@brain-lab.jp

### 1 Supplementary Tables

Supplementary Table 1 Estimated most likely locations of all channels using the probabilistic registration method.

| CH | MNI-coordinates |       |      |      | Anatomy                  | Prob.<br>% |
|----|-----------------|-------|------|------|--------------------------|------------|
|    | x               | y     | z    | SD   |                          |            |
| 1  | 65.0            | -36.3 | 48.3 | 11.5 | R-Wernicke's area (BA40) | 82%        |
| 2  | 60.7            | -10.3 | 48.3 | 11.5 | R-M1 (BA4)               | 32%        |
| 3  | 50.0            | 15.7  | 49.7 | 11.3 | R-DLPFC (BA9)            | 60%        |
| 4  | 33.7            | 34.7  | 50.7 | 11.6 | R-DLPFC (BA9)            | 75%        |
| 5  | 13.7            | 45.7  | 53.0 | 11.4 | R-DLPFC (BA9)            | 69%        |
| 6  | -9.7            | 45.7  | 52.7 | 11.5 | L-DLPFC (BA9)            | 65%        |
| 7  | -30.3           | 33.3  | 51.3 | 11.7 | L-DLPFC (BA9)            | 67%        |
| 8  | -47.0           | 15.3  | 51.3 | 10.9 | L-DLPFC (BA9)            | 62%        |
| 9  | -58.3           | -10.7 | 48.7 | 10.8 | L-M1 (BA4)               | 34%        |
| 10 | -62.3           | -36.7 | 48.7 | 11.3 | L-Wernicke's area (BA40) | 81%        |
| 11 | 66.0            | -46.7 | 35.7 | 12.3 | R-Wernicke's area (BA40) | 69%        |
| 12 | 69.0            | -18.7 | 35.7 | 10.5 | R-S1 (BA2)               | 49%        |
| 13 | 61.0            | 9.3   | 36.3 | 10.8 | R-Pre-SMA (BA6)          | 63%        |
| 14 | 47.7            | 34.7  | 38.3 | 10.6 | R-Broca's area (BA45)    | 42%        |
| 15 | 26.3            | 52.3  | 40.3 | 11.1 | R-DLPFC (BA9)            | 79%        |
| 16 | 3.3             | 56.7  | 40.3 | 11.1 | R-DLPFC (BA9)            | 85%        |
| 17 | -22.0           | 52.3  | 41.0 | 11.0 | L-DLPFC (BA9)            | 84%        |
| 18 | -43.7           | 34.7  | 38.7 | 10.3 | L-Broca's area (BA45)    | 37%        |
| 19 | -57.7           | 9.7   | 36.7 | 10.6 | L-Pre-SMA (BA6)          | 59%        |
| 20 | -66.7           | -19.3 | 35.7 | 10.4 | L-S1 (BA2)               | 52%        |

Supplementary Material

|    |       |       |       |      |                          |      |
|----|-------|-------|-------|------|--------------------------|------|
| 21 | -65.0 | -46.7 | 36.7  | 11.6 | L-Wernicke's area (BA40) | 75%  |
| 22 | 71.0  | -30.7 | 21.3  | 11.1 | R-STG (BA22)             | 51%  |
| 23 | 68.0  | 0.3   | 23.3  | 9.1  | R-Subcentral area (BA43) | 71%  |
| 24 | 57.7  | 29.7  | 24.3  | 9.5  | R-Broca's area (BA45)    | 92%  |
| 25 | 41.3  | 52.3  | 27.3  | 10.0 | R-DLPFC (BA46)           | 80%  |
| 26 | 16.7  | 65.7  | 29.3  | 10.1 | PFC (BA10)               | 83%  |
| 27 | -11.7 | 65.0  | 29.7  | 10.0 | PFC (BA10)               | 80%  |
| 28 | -36.7 | 53.7  | 27.7  | 9.7  | L-DLPFC (BA46)           | 97%  |
| 29 | -54.3 | 29.7  | 24.3  | 9.4  | L-Broca's area (BA45)    | 93%  |
| 30 | -65.3 | -0.3  | 23.3  | 9.4  | L-Subcentral area (BA43) | 73%  |
| 31 | -69.0 | -30.7 | 23.3  | 11.1 | L-STG (BA22)             | 37%  |
| 32 | 72.0  | -41.7 | 4.7   | 10.8 | R-STG (BA22)             | 58%  |
| 33 | 71.0  | -11.7 | 5.3   | 9.1  | R-STG (BA22)             | 86%  |
| 34 | 62.0  | 21.3  | 10.3  | 8.9  | R-Broca's area (BA45)    | 43%  |
| 35 | 51.0  | 48.3  | 11.3  | 8.9  | R-DLPFC (BA46)           | 64%  |
| 36 | 30.3  | 67.3  | 13.7  | 9.2  | PFC (BA10)               | 98%  |
| 37 | 4.0   | 70.0  | 15.0  | 10.0 | PFC (BA10)               | 100% |
| 38 | -25.7 | 67.7  | 14.7  | 8.8  | PFC (BA10)               | 99%  |
| 39 | -48.0 | 48.7  | 11.3  | 8.6  | L-DLPFC (BA46)           | 64%  |
| 40 | -59.0 | 21.3  | 9.7   | 8.9  | L-Broca's area (BA45)    | 42%  |
| 41 | -67.3 | -12.3 | 6.7   | 9.9  | L-STG (BA22)             | 80%  |
| 42 | -70.0 | -41.7 | 6.3   | 10.8 | L-STG (BA22)             | 63%  |
| 43 | 73.0  | -22.7 | -10.3 | 9.1  | R-MTG (BA21)             | 99%  |
| 44 | 64.3  | 5.7   | -8.7  | 9.1  | R-MTG (BA21)             | 54%  |
| 45 | 56.0  | 40.3  | -3.7  | 7.2  | R-Broca's area (BA45)    | 56%  |
| 46 | 41.3  | 62.7  | -1.7  | 7.9  | FPC (BA10)               | 76%  |
| 47 | 16.7  | 73.0  | 0.3   | 8.2  | FPC (BA10)               | 68%  |
| 48 | -12.3 | 74.0  | 0.7   | 7.7  | FPC (BA10)               | 74%  |
| 49 | -37.3 | 63.7  | -1.3  | 7.2  | FPC (BA10)               | 91%  |
| 50 | -54.0 | 40.7  | -3.7  | 6.7  | L-Broca's area (BA45)    | 59%  |
| 51 | -62.0 | 5.7   | -8.3  | 9.4  | L-MTG (BA21)             | 48%  |
| 52 | -71.0 | -22.3 | -10.3 | 9.2  | L-MTG (BA21)             | 96%  |

Supplementary Table 2 Oxy-Hb hemodynamic responses assessed using one-sample t-tests on the PRTL task for all channels.

| CH | mean   | <i>SD</i> | <i>t</i> | <i>P</i>        | <i>d</i> |
|----|--------|-----------|----------|-----------------|----------|
| 1  | 0.014  | 0.027     | 2.80     | 0.009           | 0.529    |
| 2  | 0.019  | 0.045     | 2.26     | 0.032           | 0.427    |
| 3  | 0.008  | 0.032     | 1.42     | 0.168           | 0.268    |
| 4  | 0.016  | 0.037     | 2.34     | 0.027           | 0.442    |
| 5  | 0.009  | 0.031     | 1.65     | 0.110           | 0.312    |
| 6  | 0.009  | 0.020     | 2.47     | 0.020           | 0.467    |
| 7  | 0.008  | 0.027     | 1.68     | 0.104           | 0.318    |
| 8  | 0.012  | 0.030     | 2.16     | 0.040           | 0.408    |
| 9  | 0.012  | 0.037     | 1.72     | 0.097           | 0.325    |
| 10 | 0.011  | 0.029     | 2.09     | 0.046           | 0.394    |
| 11 | 0.020  | 0.034     | 3.17     | 0.004           | 0.598    |
| 12 | 0.009  | 0.063     | 0.81     | 0.428           | 0.152    |
| 13 | 0.017  | 0.040     | 2.30     | 0.029           | 0.434    |
| 14 | 0.029  | 0.028     | 5.65     | <b>&lt;.001</b> | 1.068    |
| 15 | 0.025  | 0.039     | 3.47     | 0.002           | 0.655    |
| 16 | 0.019  | 0.034     | 2.93     | 0.007           | 0.553    |
| 17 | 0.014  | 0.022     | 3.40     | 0.002           | 0.642    |
| 18 | 0.025  | 0.033     | 4.06     | <b>&lt;.001</b> | 0.768    |
| 19 | 0.004  | 0.032     | 0.76     | 0.453           | 0.144    |
| 20 | -0.005 | 0.047     | -0.61    | 0.549           | -0.115   |
| 21 | 0.015  | 0.033     | 2.55     | 0.017           | 0.481    |
| 22 | 0.012  | 0.051     | 1.26     | 0.217           | 0.239    |
| 23 | 0.012  | 0.058     | 1.16     | 0.258           | 0.218    |
| 24 | 0.027  | 0.045     | 3.20     | 0.003           | 0.604    |
| 25 | 0.041  | 0.034     | 6.57     | <b>&lt;.001</b> | 1.241    |
| 26 | 0.031  | 0.031     | 5.50     | <b>&lt;.001</b> | 1.040    |
| 27 | 0.030  | 0.040     | 3.97     | <b>&lt;.001</b> | 0.750    |
| 28 | 0.031  | 0.039     | 4.24     | <b>&lt;.001</b> | 0.801    |
| 29 | 0.019  | 0.033     | 3.03     | .005            | 0.572    |
| 30 | -0.007 | 0.064     | -0.57    | .572            | -0.108   |
| 31 | 0.004  | 0.044     | 0.45     | .659            | 0.084    |
| 32 | 0.016  | 0.048     | 1.78     | .085            | 0.337    |
| 33 | 0.012  | 0.062     | 1.02     | .315            | 0.193    |

Supplementary Material

|    |        |       |       |                 |        |
|----|--------|-------|-------|-----------------|--------|
| 34 | 0.023  | 0.057 | 2.18  | .038            | 0.413  |
| 35 | 0.033  | 0.033 | 5.40  | <b>&lt;.001</b> | 1.020  |
| 36 | 0.039  | 0.038 | 5.51  | <b>&lt;.001</b> | 1.042  |
| 37 | 0.032  | 0.049 | 3.47  | .002            | 0.657  |
| 38 | 0.032  | 0.056 | 3.07  | .005            | 0.580  |
| 39 | 0.031  | 0.039 | 4.28  | <b>&lt;.001</b> | 0.809  |
| 40 | 0.001  | 0.055 | 0.08  | .936            | 0.015  |
| 41 | 0.004  | 0.066 | 0.30  | .766            | 0.057  |
| 42 | -0.005 | 0.049 | -0.56 | .583            | -0.105 |
| 43 | 0.010  | 0.059 | 0.87  | .393            | 0.164  |
| 44 | 0.016  | 0.069 | 1.28  | .210            | 0.242  |
| 45 | 0.027  | 0.049 | 3.02  | .005            | 0.570  |
| 46 | 0.040  | 0.035 | 6.14  | <b>&lt;.001</b> | 1.161  |
| 47 | 0.037  | 0.047 | 4.24  | <b>&lt;.001</b> | 0.801  |
| 48 | 0.039  | 0.053 | 3.98  | <b>&lt;.001</b> | 0.751  |
| 49 | 0.037  | 0.048 | 4.19  | <b>&lt;.001</b> | 0.792  |
| 50 | 0.027  | 0.048 | 2.97  | .006            | 0.561  |
| 51 | 0.014  | 0.081 | 0.90  | .377            | 0.170  |
| 52 | 0.006  | 0.078 | 0.40  | .692            | 0.076  |

Notes.  $p$  values of significant channels ( $p < \alpha (= .05) / 52$ ) are in boldface.  $SD$  = standard deviation of spatial estimates;  $t$  =  $t$ -values;  $p$  =  $p$ -values;  $d$  = Cohen's  $d$ .

Supplementary Table 3 Deoxy-Hb hemodynamic responses assessed using one-sample t-tests on the PRTL task.

| CH | mean   | <i>SD</i> | <i>t</i> | <i>P</i>    | <i>d</i> |
|----|--------|-----------|----------|-------------|----------|
| 1  | -0.001 | 0.011     | -0.49    | .631        | -0.09    |
| 2  | 0.000  | 0.027     | -0.10    | .922        | -0.02    |
| 3  | -0.010 | 0.021     | -2.51    | .018        | -0.47    |
| 4  | -0.001 | 0.010     | -0.80    | .432        | -0.15    |
| 5  | 0.000  | 0.009     | -0.10    | .918        | -0.02    |
| 6  | -0.003 | 0.011     | -1.26    | .219        | -0.24    |
| 7  | 0.000  | 0.010     | 0.10     | .922        | 0.02     |
| 8  | 0.003  | 0.010     | 1.69     | .103        | 0.32     |
| 9  | 0.001  | 0.013     | 0.38     | .709        | 0.07     |
| 10 | -0.006 | 0.010     | -3.03    | .005        | -0.57    |
| 11 | -0.004 | 0.013     | -1.75    | .091        | -0.33    |
| 12 | 0.000  | 0.018     | -0.03    | .976        | -0.01    |
| 13 | -0.008 | 0.021     | -1.99    | .057        | -0.38    |
| 14 | 0.002  | 0.011     | 1.14     | .265        | 0.21     |
| 15 | 0.000  | 0.009     | -0.06    | .955        | -0.01    |
| 16 | 0.003  | 0.018     | 0.83     | .416        | 0.16     |
| 17 | 0.004  | 0.015     | 1.57     | .128        | 0.30     |
| 18 | 0.000  | 0.009     | -0.25    | .802        | -0.05    |
| 19 | 0.003  | 0.012     | 1.47     | .153        | 0.28     |
| 20 | 0.004  | 0.022     | 0.98     | .336        | 0.19     |
| 21 | -0.003 | 0.013     | -1.28    | .212        | -0.24    |
| 22 | 0.001  | 0.023     | 0.14     | .892        | 0.03     |
| 23 | 0.002  | 0.025     | 0.37     | .712        | 0.07     |
| 24 | -0.001 | 0.012     | -0.24    | .813        | -0.05    |
| 25 | 0.000  | 0.010     | -0.15    | .885        | -0.03    |
| 26 | 0.003  | 0.011     | 1.45     | .159        | 0.27     |
| 27 | 0.007  | 0.010     | 3.76     | <b>.001</b> | 0.71     |
| 28 | 0.001  | 0.013     | 0.49     | .631        | 0.09     |
| 29 | 0.003  | 0.008     | 1.90     | .068        | 0.36     |
| 30 | 0.002  | 0.033     | 0.31     | .756        | 0.06     |
| 31 | -0.001 | 0.028     | -0.11    | .917        | -0.02    |
| 32 | -0.013 | 0.027     | -2.55    | .017        | -0.48    |
| 33 | -0.003 | 0.026     | -0.66    | .518        | -0.12    |

Supplementary Material

|    |        |       |       |                 |       |
|----|--------|-------|-------|-----------------|-------|
| 34 | -0.005 | 0.021 | -1.15 | .258            | -0.22 |
| 35 | 0.003  | 0.011 | 1.35  | .187            | 0.26  |
| 36 | 0.006  | 0.013 | 2.58  | .015            | 0.49  |
| 37 | 0.011  | 0.020 | 2.96  | .006            | 0.56  |
| 38 | 0.010  | 0.016 | 3.34  | .002            | 0.63  |
| 39 | 0.005  | 0.008 | 3.09  | .004            | 0.58  |
| 40 | 0.004  | 0.028 | 0.84  | .408            | 0.16  |
| 41 | 0.000  | 0.046 | 0.05  | .961            | 0.01  |
| 42 | -0.001 | 0.028 | -0.21 | .837            | -0.04 |
| 43 | -0.003 | 0.033 | -0.41 | .683            | -0.08 |
| 44 | -0.003 | 0.030 | -0.57 | .574            | -0.11 |
| 45 | 0.001  | 0.021 | 0.35  | .726            | 0.07  |
| 46 | 0.005  | 0.012 | 2.52  | .018            | 0.48  |
| 47 | 0.010  | 0.013 | 4.42  | <b>&lt;.001</b> | 0.84  |
| 48 | 0.013  | 0.014 | 4.72  | <b>&lt;.001</b> | 0.89  |
| 49 | 0.008  | 0.016 | 2.68  | .012            | 0.51  |
| 50 | 0.009  | 0.018 | 2.54  | .017            | 0.48  |
| 51 | 0.001  | 0.038 | 0.13  | .897            | 0.02  |
| 52 | 0.003  | 0.033 | 0.48  | .634            | 0.09  |

Notes.  $p$  values of significant channels ( $p < \alpha (= .05) / 52$ ) are in boldface.  $SD$  = standard deviation of spatial estimates;  $t$  =  $t$ -values;  $p$  =  $p$ -values;  $d$  = Cohen's  $d$ .

Supplementary Table 4 Oxy-Hb hemodynamic response contrast between expensive and inexpensive conditions assessed using paired t-tests for channels activated by PRTLTL.

| CH | mean diff. | SD    | t    | p           | d    |
|----|------------|-------|------|-------------|------|
| 14 | 0.007      | 0.045 | 0.84 | .408        | 0.16 |
| 18 | 0.014      | 0.037 | 1.95 | .062        | 0.37 |
| 25 | 0.018      | 0.045 | 2.16 | .040        | 0.41 |
| 26 | 0.017      | 0.041 | 2.18 | .038        | 0.41 |
| 27 | 0.022      | 0.046 | 2.63 | .014        | 0.50 |
| 28 | 0.020      | 0.038 | 2.87 | <b>.008</b> | 0.54 |
| 35 | 0.006      | 0.045 | 0.70 | .489        | 0.13 |
| 36 | 0.014      | 0.038 | 1.96 | .060        | 0.37 |
| 39 | 0.013      | 0.040 | 1.71 | .098        | 0.32 |
| 46 | 0.011      | 0.036 | 1.64 | .112        | 0.31 |
| 47 | 0.019      | 0.035 | 2.96 | <b>.006</b> | 0.56 |
| 48 | 0.028      | 0.048 | 3.12 | <b>.004</b> | 0.59 |
| 49 | 0.019      | 0.047 | 2.16 | .040        | 0.41 |

Notes. p values of significant channels ( $p < \alpha (= .05) / \text{Meff value}$ ) are in boldface. Meff value = 5.23. SD = standard deviation of spatial estimates;  $t = t$ -values;  $p = p$ -values;  $d = \text{Cohen's } d$ .

Supplementary Table 5 Deoxy-Hb hemodynamic response contrast between expensive and inexpensive conditions assessed using paired t-tests for channels presented in Supplementary Table 4.

| CH | mean diff. | SD    | t     | p    | d     |
|----|------------|-------|-------|------|-------|
| 14 | -0.005     | 0.013 | -1.99 | .056 | -0.38 |
| 18 | -0.004     | 0.010 | -2.20 | .036 | -0.42 |
| 25 | -0.004     | 0.013 | -1.76 | .090 | -0.33 |
| 26 | -0.003     | 0.009 | -1.66 | .107 | -0.31 |
| 27 | -0.001     | 0.010 | -0.44 | .660 | -0.08 |
| 28 | -0.003     | 0.012 | -1.22 | .233 | -0.23 |
| 35 | 0.000      | 0.020 | -0.07 | .947 | -0.01 |
| 36 | -0.003     | 0.016 | -1.02 | .315 | -0.19 |
| 39 | -0.002     | 0.010 | -1.21 | .237 | -0.23 |
| 46 | 0.004      | 0.018 | 1.09  | .285 | 0.21  |
| 47 | 0.003      | 0.010 | 1.63  | .115 | 0.31  |
| 48 | 0.004      | 0.012 | 1.81  | .080 | 0.34  |
| 49 | 0.001      | 0.014 | 0.29  | .773 | 0.06  |

Notes. p values of significant channels ( $p < \alpha (= .05) / \text{Meff value}$ ) are in boldface. Meff value = 8.23. SD = standard deviation of spatial estimates;  $t = t$ -values;  $p = p$ -values;  $d = \text{Cohen's } d$ .



## 2 Supplementary Figures

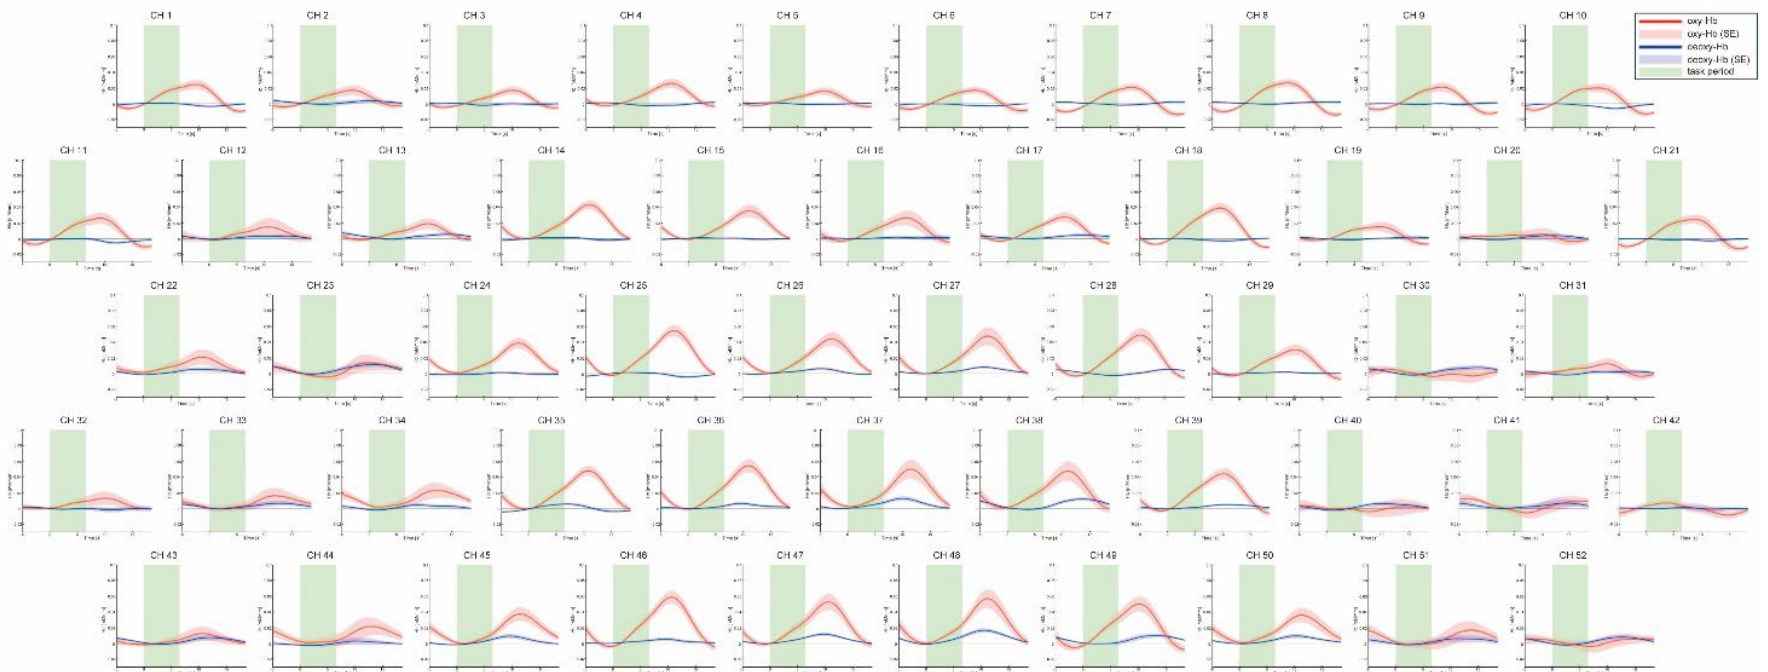

Supplementary Figure 1 Observed oxy-Hb and deoxy-Hb time-series data for all fNIRS channels during the PRTL.

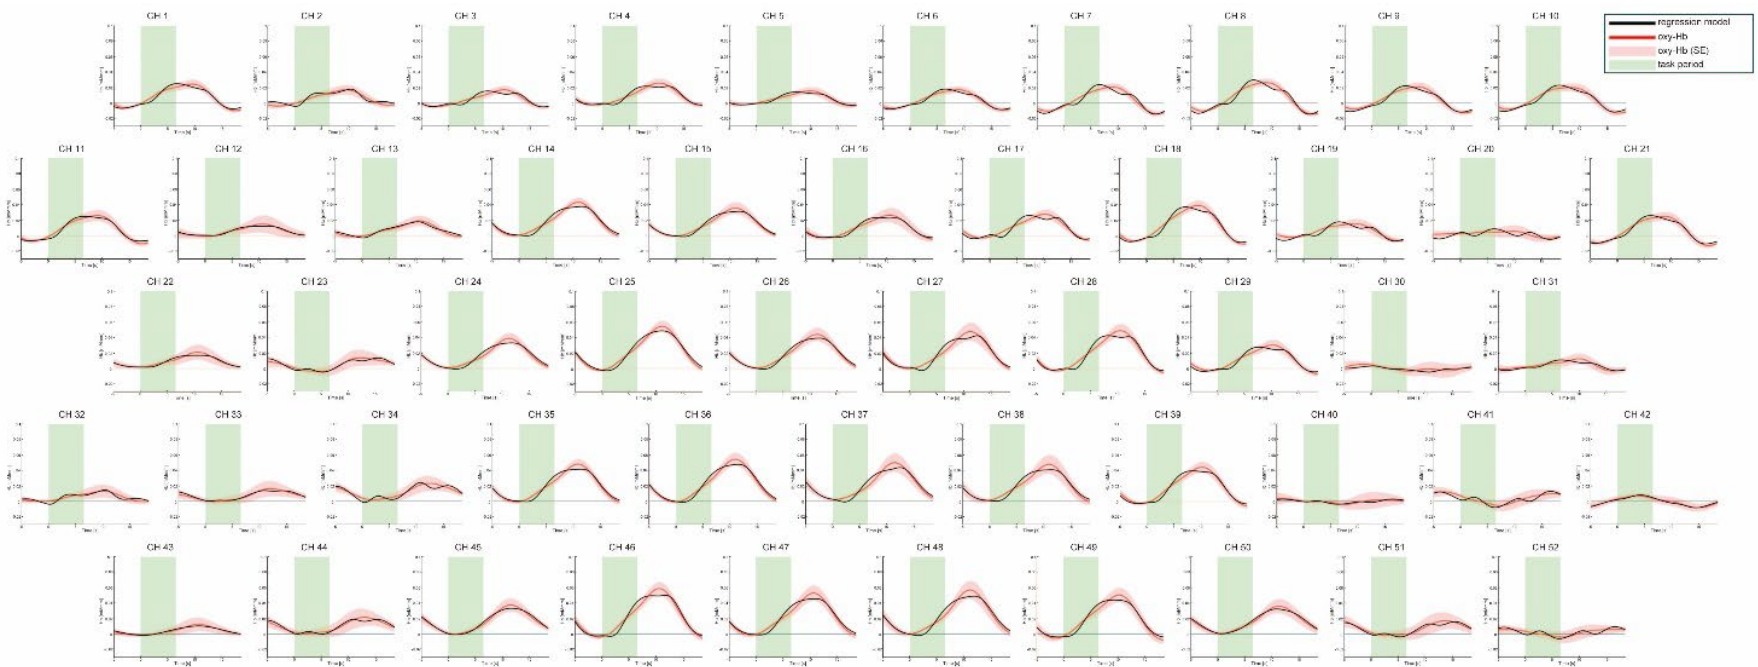

Supplementary Figure 2 Comparison between observed and predicted oxy-Hb hemodynamic time-series data for the PRTLTL.

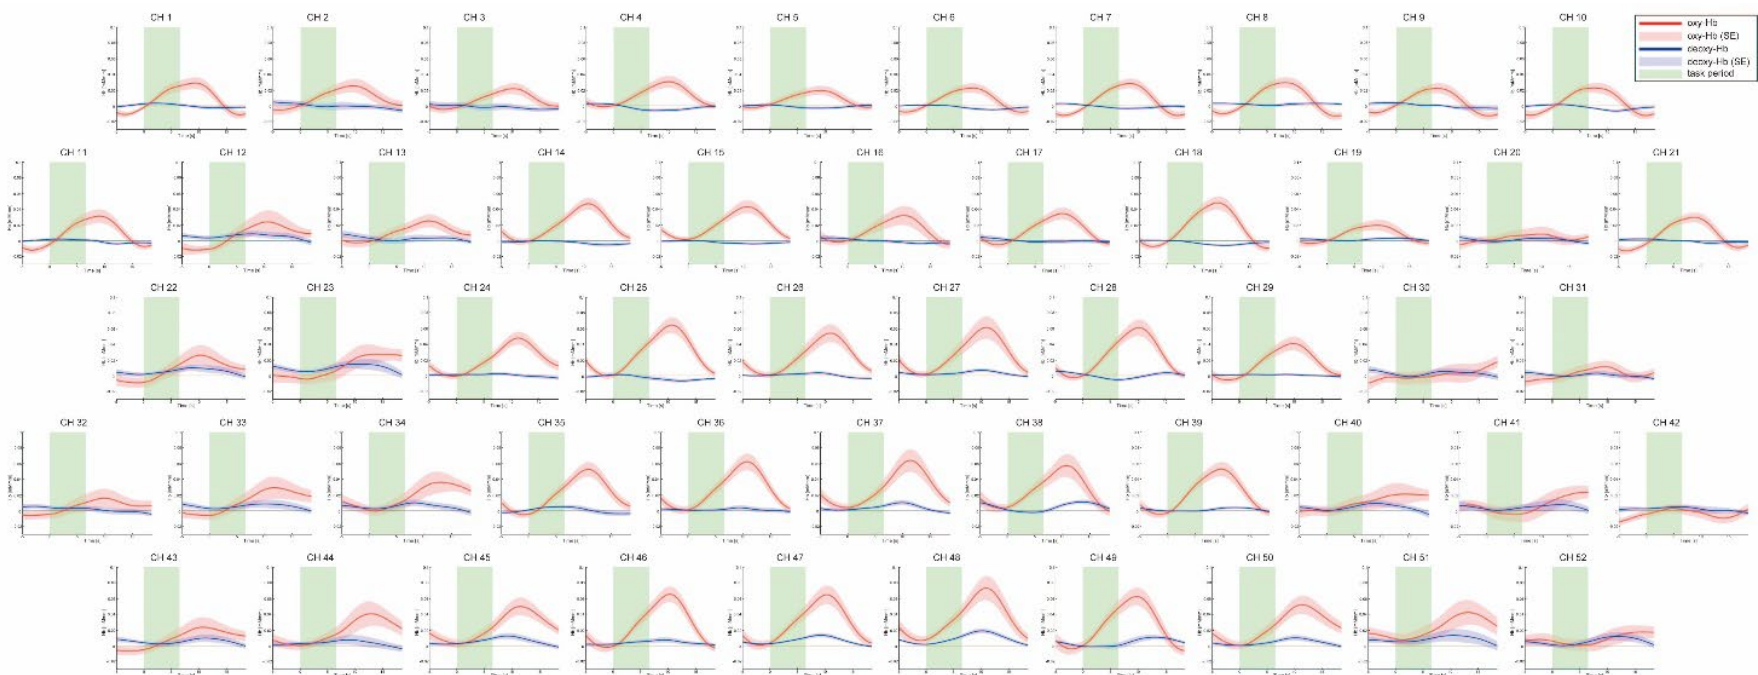

Supplementary Figure 3 Observed oxy-Hb and deoxy-Hb time-series data for all fNIRS channels in the expensive condition.

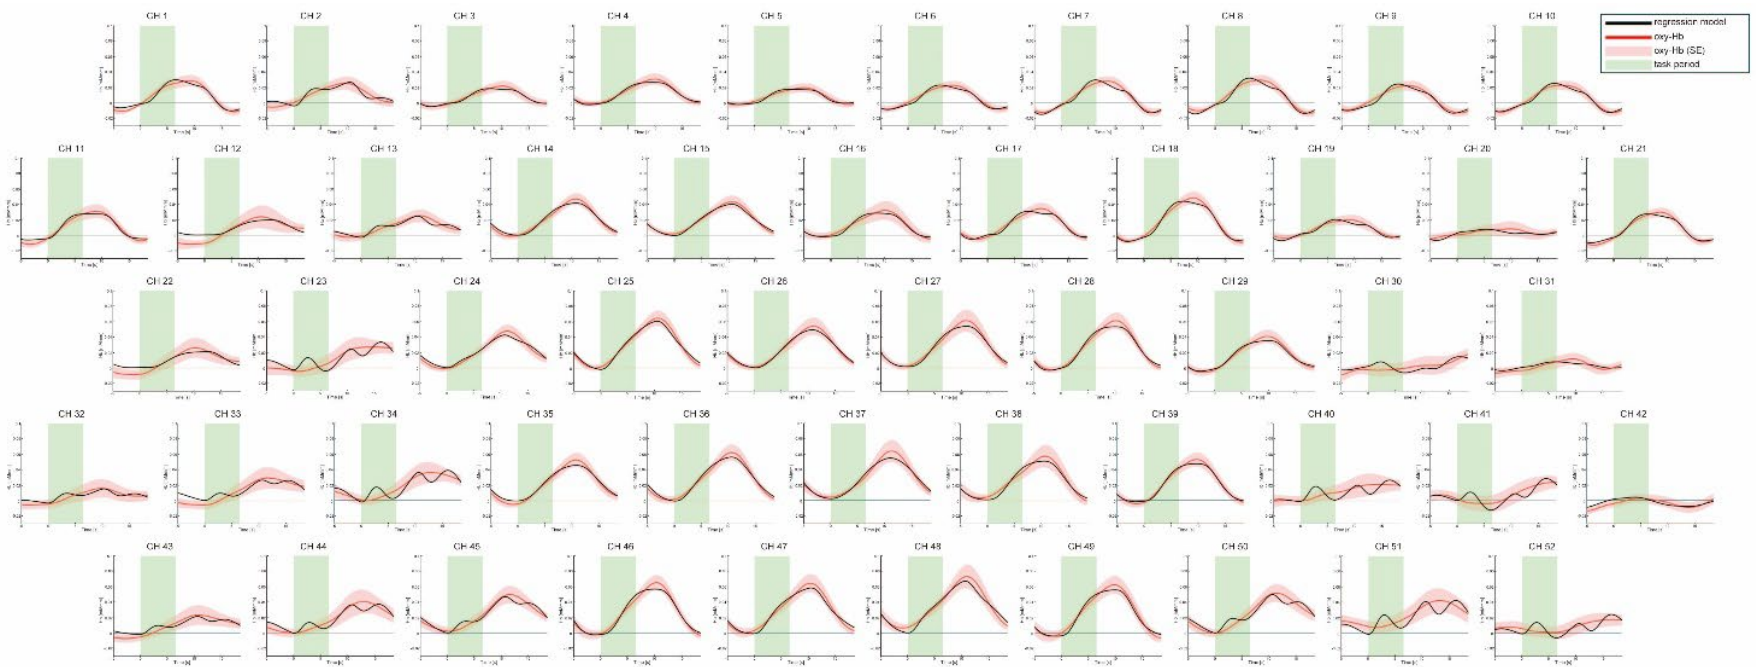

Supplementary Figure 4 Comparison between observed and predicted oxy-Hb hemodynamic time-series data in the expensive condition.

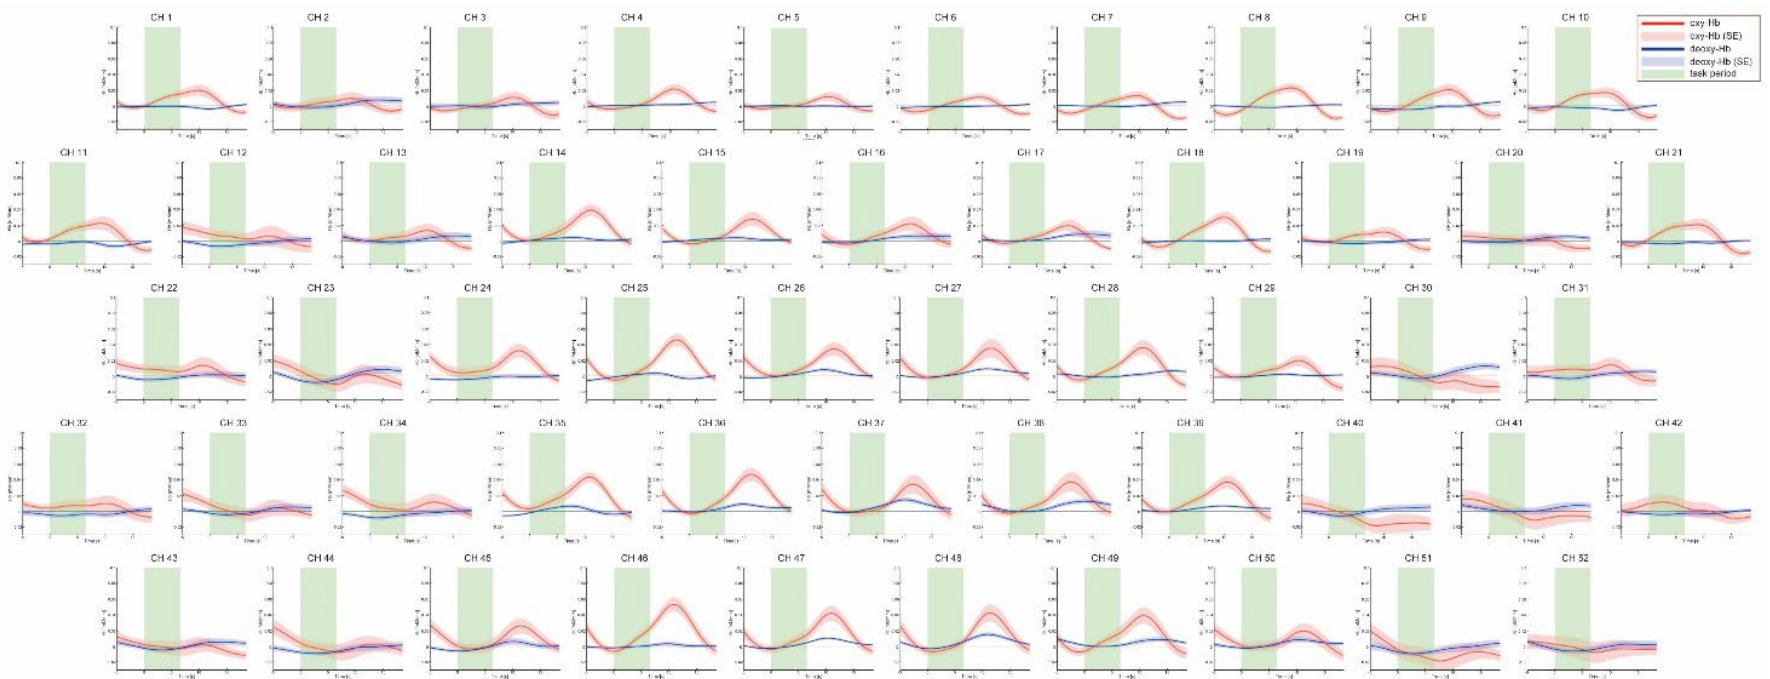

Supplementary Figure 5 Observed oxy-Hb and deoxy-Hb time-series data for all fNIRS channels in the inexpensive condition.

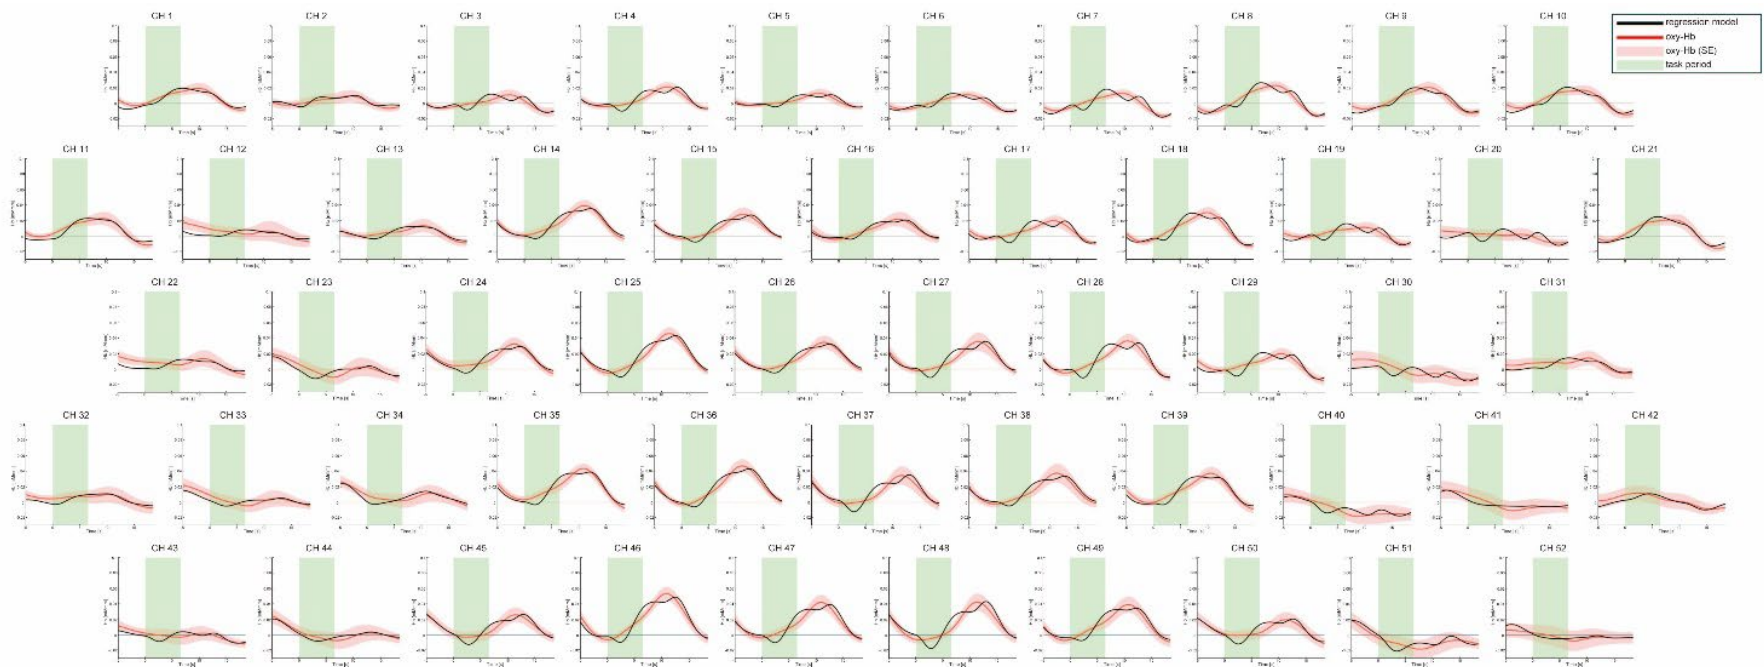

Supplementary Figure 6 Comparison between observed and predicted oxy-Hb hemodynamic time-series data in the inexpensive condition.
